# Supplementary material for: Fluorometric recognition of both dihydrogen phosphate and iodide by a new flexible anthracene linked benzimidazolium-based receptor
Source: publisher site journal article supplement (doi:10.3762/bjoc.7.34), 2011-02-25
Supplement: Additional file 1 [file 1860-5397-7-34-S1.pdf]

# Supporting Information

for

## Fluorometric recognition of both dihydrogen phosphate and iodide by a new flexible anthracene linked benzimidazolium-based receptor

Kumaresh Ghosh<sup>\*§</sup> and Debasis Kar

Department of Chemistry, University of Kalyani, Kalyani-741235, India.

Email: Kumaresh Ghosh - [ghosh\\_k2003@yahoo.co.in](mailto:ghosh_k2003@yahoo.co.in)

<sup>§</sup>Fax: +913325828282; Tel: +913325828750

\*Corresponding author

### Supplementary Data

#### 1. Absorption spectra

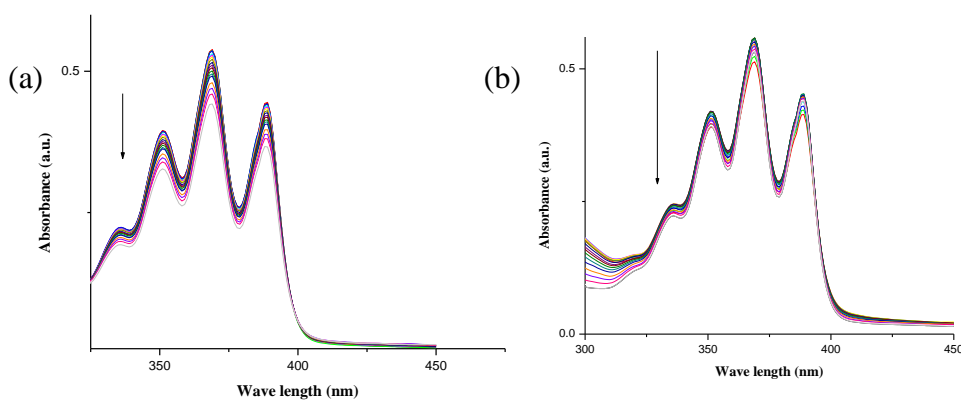

**Figure 1S:** Change in absorption spectra of **1** ( $c = 5.78 \times 10^{-5} \text{ M}$ ) on titration with (a)  $\text{F}^-$  and (b)  $\text{I}^-$ .

## 2. Fluorescence spectra

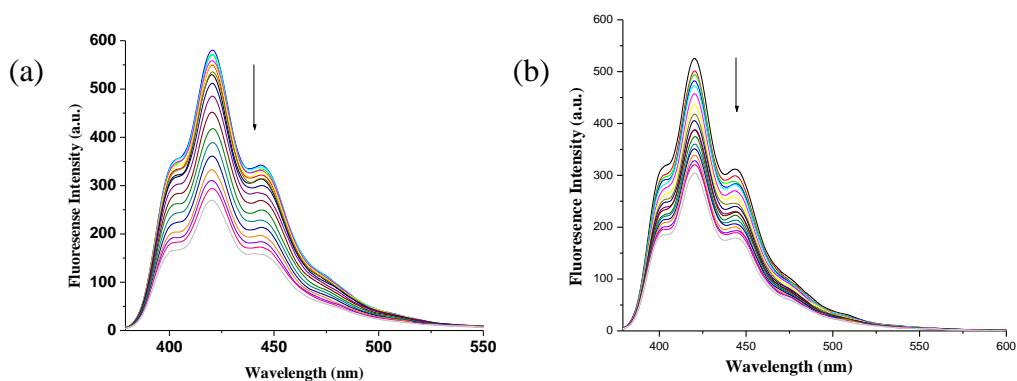

**Figure 2S:** Change in emission spectra of **1** ( $c = 5.78 \times 10^{-5}$  M) on titration with (a) F<sup>-</sup> and (b) I<sup>-</sup> in CH<sub>3</sub>CN.

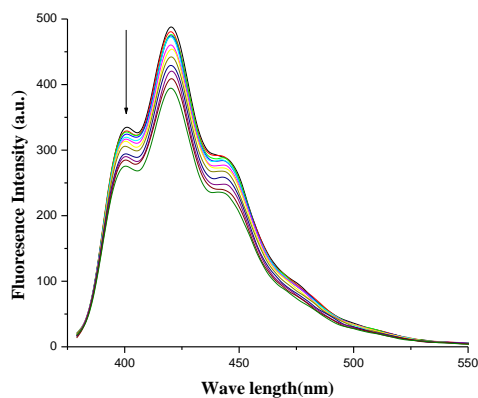

**Figure 3S:** Change in emission spectra of **2** ( $c = 5.78 \times 10^{-5}$  M) in presence of increasing amounts of tetrabutylammonium dihydrogen phosphate in CH<sub>3</sub>CN.

## 3. Fluorescence Job plots in CH<sub>3</sub>CN.

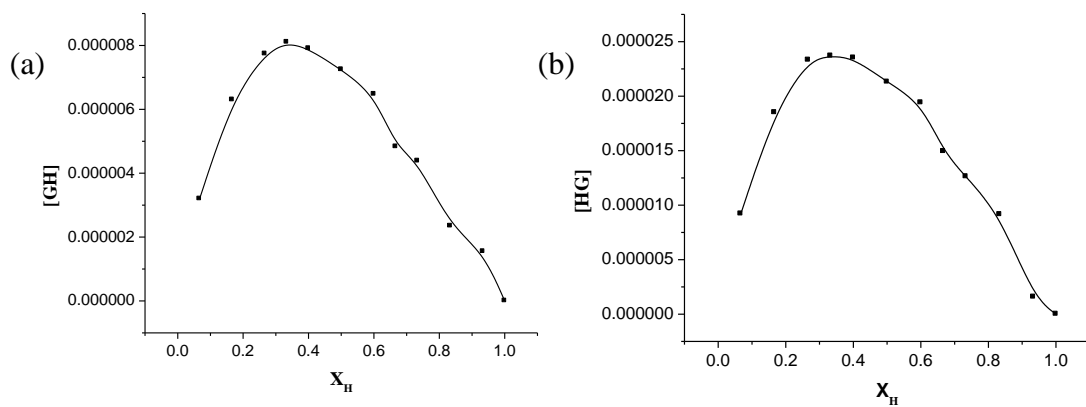

**Figure 4S:** Fluorescence Job plots for **1** with (a) fluoride and (b) iodide.

#### 4. UV-vis titration curves for **1** with the anions in CH<sub>3</sub>CN.

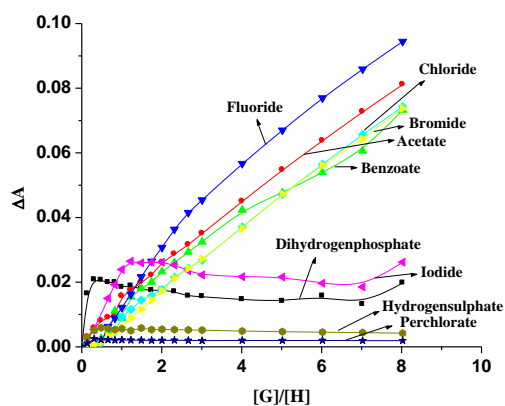

**Figure 5S:** Plot of change in absorbance of **1** at 369 nm vs the ratio of guest to host concentration in CH<sub>3</sub>CN.

#### 5. Binding constant curves

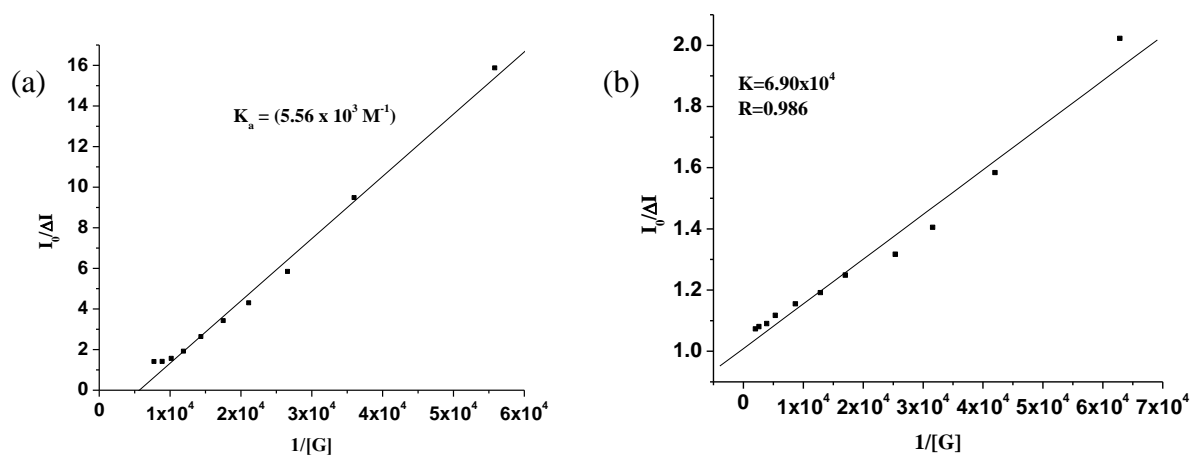

**Figure 6S:** Binding constant curves for **1** with (a) H<sub>2</sub>PO<sub>4</sub><sup>-</sup> in CH<sub>3</sub>CN and (b) iodide in CHCl<sub>3</sub> containing 0.1% CH<sub>3</sub>CN.

#### 6. Change in emission of **1** in aq CH<sub>3</sub>OH (CH<sub>3</sub>OH:H<sub>2</sub>O = 4:1 v/v).

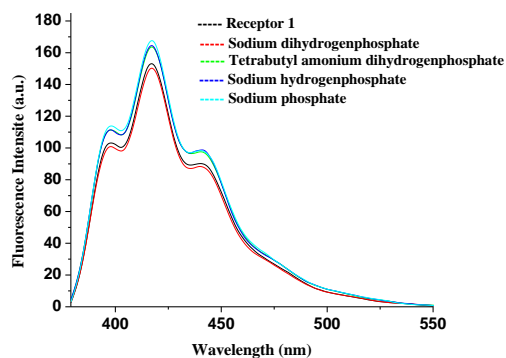

**Figure 7S:** Change in fluorescence emission of **1** ( $c = 2.46 \times 10^{-5}$  M) in the presence of 1 equiv of the salts of different guests in aq CH<sub>3</sub>OH.

7. (a) Fluorescence titration curves for **1** with the anions in  $\text{CHCl}_3$  containing 0.1%  $\text{CH}_3\text{CN}$ .

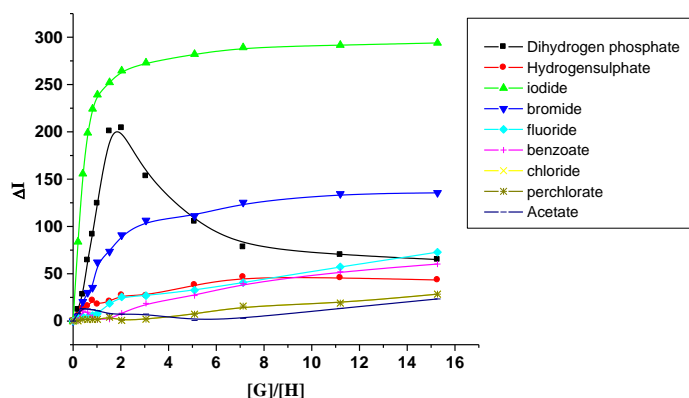

Figure 8S: Plot of change in emission of **1** at 420 nm vs the ratio of guest to host concentration.

(b) Fluorescence titration curves for **2** with the anions in  $\text{CHCl}_3$  containing 0.1%  $\text{CH}_3\text{CN}$ .

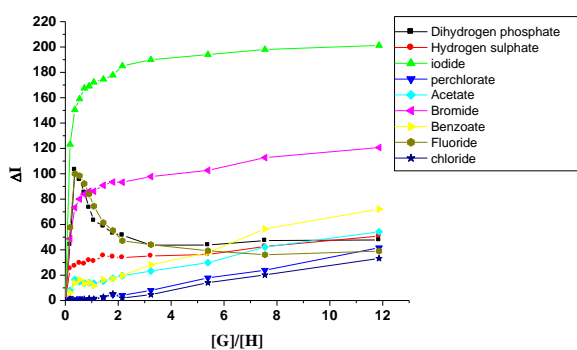

Figure 9S: Plot of change in emission of **2** vs the ratio of guest to host concentration.

8. Fluorescence Job plots anions in  $\text{CHCl}_3$  containing 0.1%  $\text{CH}_3\text{CN}$ .

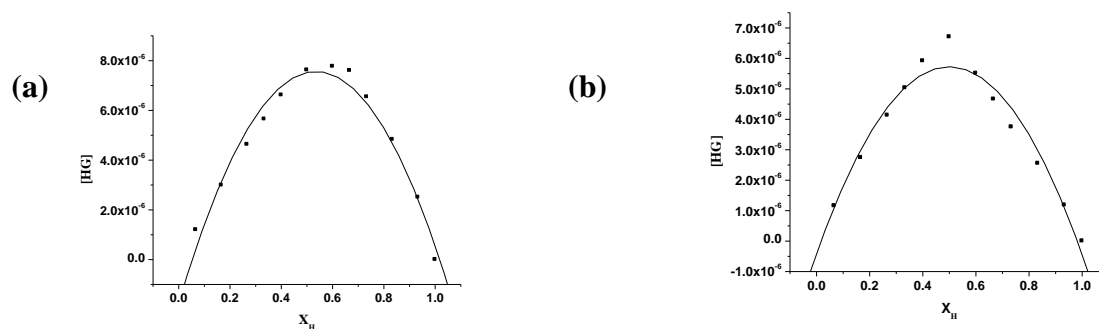

Figure 10S: Fluorescence Job plots for **1** with (a) iodide and (b) dihydrogen phosphate.

## 9. Change in $^1\text{H}$ NMR of **1** in the presence of $\text{F}^-$ .

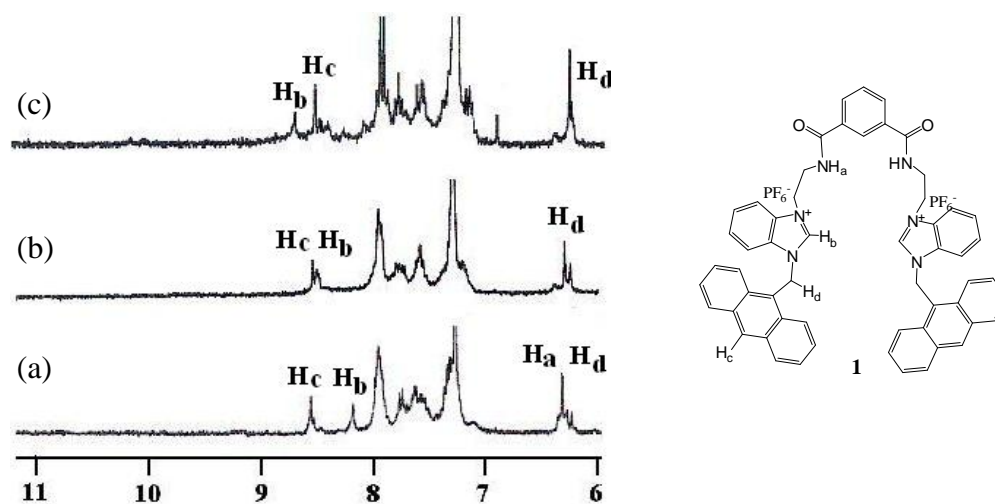

**Figure 11S:** Partial  $^1\text{H}$  NMR (300 MHz,  $\text{CDCl}_3$  containing 4%  $\text{CD}_3\text{CN}$ ) spectra of (a) **1** ( $c = 1.36 \times 10^{-3}$  M), (b) 1:1 and (c) 2:1 (guest:host) complexes with  $\text{F}^-$ ; Note: After 1 equiv addition of  $\text{F}^-$  the amide protons  $\text{H}_a$  of **1** were difficult to identify correctly.
